# Supplementary material for: Optimization of information transmission through a noisy biochemical pathway explains the choice of reaction rates
Source: Research Square preprint supplement (doi:10.21203/rs.3.rs-2462357/v1), 2023-01-13
Supplement: Supplementary file 1 [file 8d9d60915f163fd7dc7397fb.pdf]

# Optimization of information transmission through a noisy biochemical pathway explains the choice of reaction rates SUPPLEMENTARY

Anush Mahajan<sup>1</sup>, and Bhaswar Ghosh<sup>1,\*</sup>

\*bhaswar.ghosh@iiit.ac.in

## Estimated Parameters

1.  $k_1 = 1078.4 \text{ nM}^{-1} \text{ min}^{-1}$
2.  $S_{\text{basal}} = 86.68 \text{ min}^{-1}$
3.  $P_{\text{basal}} = 2036.6 \text{ min}^{-1}$
4.  $j_x = 0.7653 \text{ nM min}^{-1}$
5.  $N_{G_x} = 0.3344$
6.  $d_x = 0.0304 \text{ min}^{-1}$
7.  $K_{GFP} = 3.7001 \text{ nM}$
8.  $j_{GFP} = 0.0594 \text{ nM min}^{-1}$
9.  $d_{GFP} = 0.0363 \text{ min}^{-1}$
10.  $N_{G_{GFP}} = 0.2281$
11.  $k_2 = 2652.9 \text{ nM}^{-1} \text{ min}^{-1}$
12.  $j_P = 0.0174 \text{ nM min}^{-1}$
13.  $N_{G_P} = 2.6023$
14.  $K_2 = 0.2081 \text{ nM}$
15.  $d_P = 0.0174 \text{ min}^{-1}$

## The mean and variance of the one stage phosphorylation cascade

In the schematic diagram of a one-stage phosphorylation cycle shown below, S corresponds to the signaling molecule.  $X_1$  ( $X_2$ ) represents the dephosphorylated (phosphorylated) form of the signaling protein X.

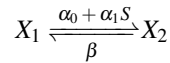

The dynamics of the active protein concentration is given by

$$\frac{dx_2}{dt} = (\alpha_0 + \alpha_1 s)X_T - \{(\alpha_0 + \alpha_1 s) + \beta\}x_2 \quad (1)$$

The steady state value of active  $X(x_2)$  is given by

$$x_{2s} = \frac{(\alpha_0 + \alpha_1 s)X_T}{(\alpha_0 + \alpha_1 s) + \beta} \quad (2)$$

The linearized equation around a steady state with adding a Gaussian white noise term

$$\frac{d\Delta x_2}{dt} = -\{(\alpha_0 + \alpha_1 s) + \beta\} \Delta x_2 + \xi_1(t) \quad (3)$$

$$\langle \xi_1(t_1) \rangle = 0 \quad (4)$$

$$\langle \xi_1(t_1) \xi_1(t_2) \rangle = 2\beta x_{2s} \delta(t_1 - t_2) \quad (5)$$

The variance in the active protein concentration

$$\sigma_x^2 = \langle \Delta x_2^2 \rangle = \frac{(\alpha_0 + \alpha_1 s) \beta X_T}{(\alpha_0 + \alpha_1 s + \beta)^2} \quad (6)$$

## Functional Relationship of Fisher Information with amplification and noise

The probability distributions are assumed to be normal at each value of the input

$$p(x | \theta) = \frac{1}{\sqrt{2\pi\sigma(\theta)^2}} e^{-\frac{1}{2} \left( \frac{x - \mu(\theta)}{\sigma(\theta)} \right)^2} \quad (7)$$

$$\frac{\partial}{\partial \theta} \log[p(x | \theta)] = \frac{(x - \mu)}{\sigma^2} \frac{\partial \mu}{\partial \theta} + \frac{1}{\sigma} \left( \frac{(x - \mu)^2}{\sigma^2} - 1 \right) \frac{\partial \sigma}{\partial \theta} \quad (8)$$

$$\begin{aligned} \left( \frac{\partial}{\partial \theta} \log[p(x | \theta)] \right)^2 &= \frac{(x - \mu)^2}{\sigma^4} \left( \frac{\partial \mu}{\partial \theta} \right)^2 + \frac{1}{\sigma^2} \left( \frac{(x - \mu)^4}{\sigma^4} + 1 - 2 \frac{(x - \mu)^2}{\sigma^2} \right) \left( \frac{\partial \sigma}{\partial \theta} \right)^2 + \frac{1}{\sigma^3} \left( \frac{(x - \mu)^3}{\sigma^2} - (x - \mu) \right) \\ &\quad \times \left( \frac{\partial \mu}{\partial \theta} \right) \left( \frac{\partial \sigma}{\partial \theta} \right) \end{aligned} \quad (9)$$

Taking average over  $x$  while the cross term vanishes due to zero moments of the odd exponents for normal distribution and  $\langle (x - \mu)^4 \rangle = 3\sigma^4$ ;  $\langle (x - \mu)^2 \rangle = \sigma^2$ , we obtain

$$\left\langle \left( \frac{\partial}{\partial \theta} \log[p(x | \theta)] \right)^2 \right\rangle = \frac{1}{\sigma^2} \left[ \left( \frac{\partial \mu}{\partial \theta} \right)^2 + 2 \left( \frac{\partial \sigma}{\partial \theta} \right)^2 \right] \quad (10)$$

now,

$$\frac{1}{\sigma^2} \left( \frac{\partial \sigma}{\partial \theta} \right)^2 = \left( \frac{1}{\sigma} \frac{\partial \sigma}{\partial \theta} \right)^2 \quad (11)$$

Thus, the first term in Equation S10 would contain the total number of molecule ( $X_T$ ) while the second term is independent of  $X_T$ . Hence, the Fisher information when  $X_T$  is large can be approximated as,

$$F(\theta) = \left\langle \left( \frac{\partial}{\partial \theta} \log[p(x | \theta)] \right)^2 \right\rangle \approx \frac{1}{\sigma^2} \left( \frac{\partial \mu}{\partial \theta} \right)^2 \quad (12)$$

## Figures

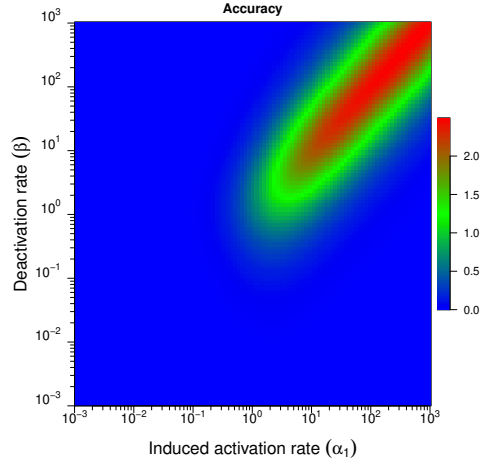

(a)

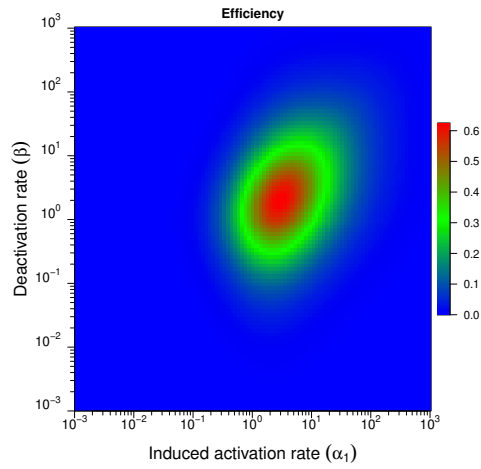

(b)

**Figure S1. The optimization of information transmission from the analytical calculation in 2-dimension.**(a) The heatmap displays the accuracy as function of the induced activation rate ( $\alpha_1$ ) and the deactivation rate ( $\beta$ ) (b) The heatmap displays the efficiency as function of the induced activation rate ( $\alpha_1$ ) and deactivation rate ( $\beta$ )

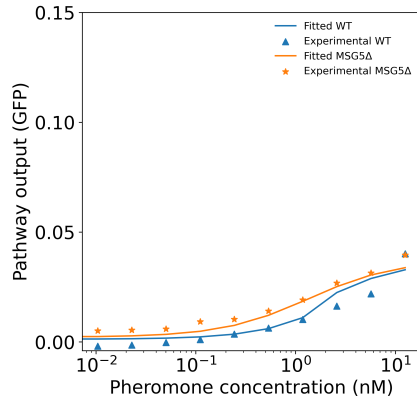

(a)

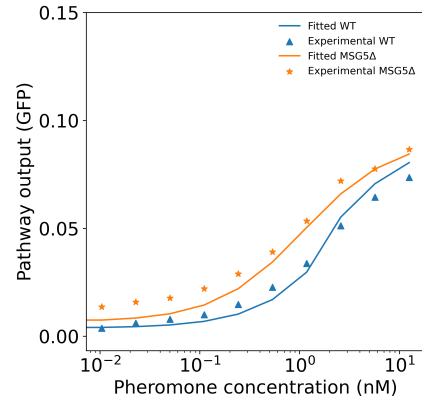

(b)

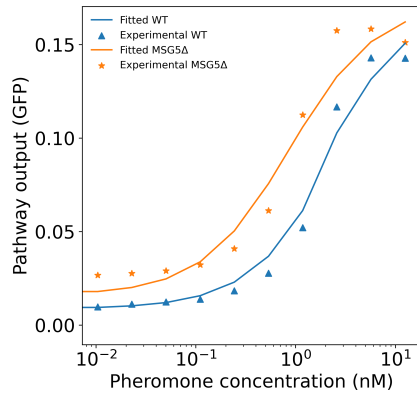

(c)

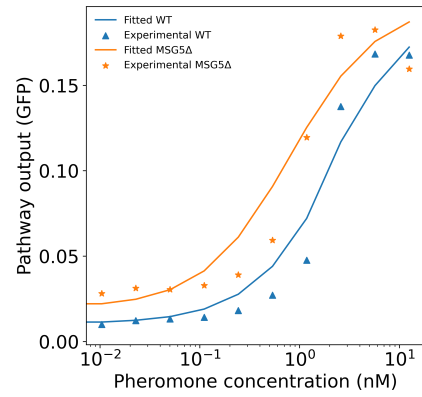

(d)

**Figure S2.** The fitted curves along with the experimentally measured GFP output values at the various time lapse indices shown for the WT and the MSG5Δ strain as indicated (a) First time-lapse index (b) Second time-lapse index (c) Fourth time-lapse index (d) Fifth time-lapse index

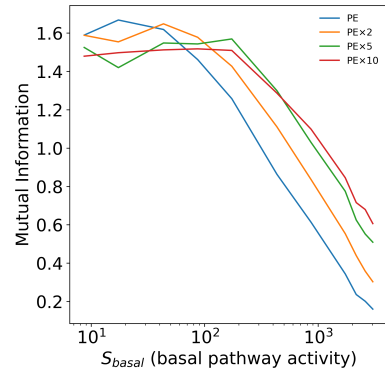

(a)

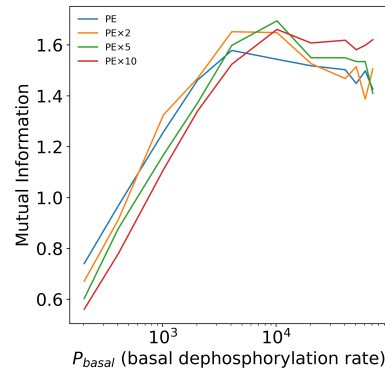

(b)

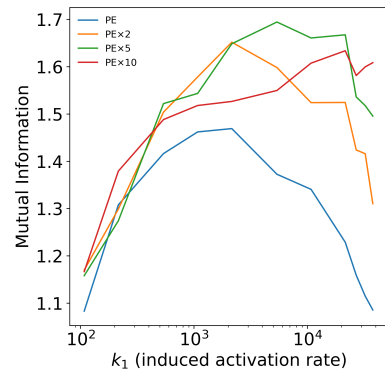

(c)

**Figure S3.** (a) Mutual information vs  $S_{basal}$  at four different values of the induced activation rate ( $k_1$ ) as indicated in the legend while keeping other parameter values fixed at estimated values. PE corresponds to the estimated parameter value of  $k_1$ . (b) Mutual information vs  $P_{basal}$  at four different values of the induced activation rate ( $k_1$ ) as indicated in the legend while keeping other parameter values fixed at estimated values. PE corresponds to the estimated parameter value of  $k_1$ . (c) Mutual information vs  $k_1$  at four different values of the induced activation rate ( $P_{basal}$ ) as indicated in the legend while keeping other parameter values fixed at estimated values. PE corresponds to the estimated parameter value of  $P_{basal}$ .

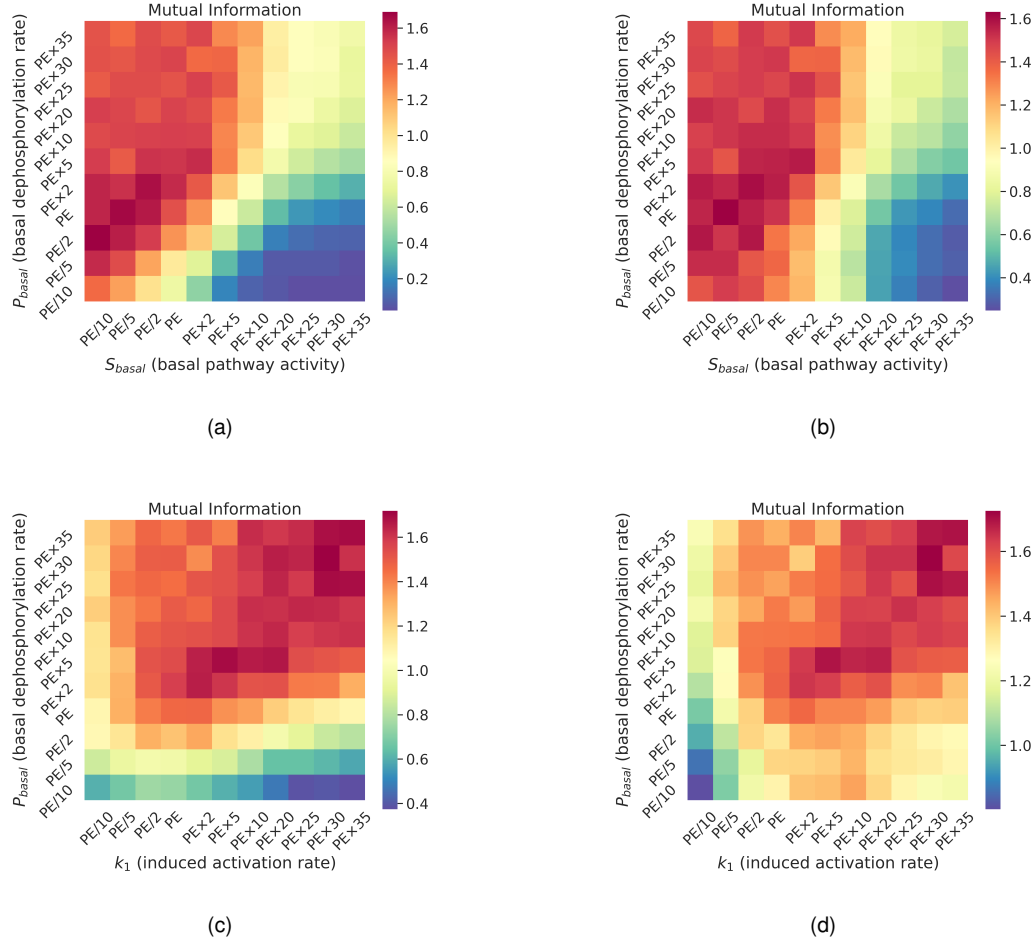

**Figure S4.** (a) Heatmap shows the mutual information as function of  $S_{basal}$  and  $P_{basal}$ . The PE on x-axis corresponds to estimated value of the induced activation rate ( $S_{basal}$ ) while The PE on y-axis corresponds to estimated value of the basal deactivation rate ( $P_{basal}$ ). (b) Heatmap shows the accuracy as function of  $S_{basal}$  and  $P_{basal}$  for WT in presence of the induced feedback loop. The PE on x-axis corresponds to estimated value of the basal pathway activity ( $S_{basal}$ ) while The PE on y-axis corresponds to estimated value of the basal deactivation rate ( $P_{basal}$ ). (c) Heatmap shows the mutual information as function of  $k_1$  and  $P_{basal}$ . The PE on x-axis corresponds to estimated value of the induced activation rate ( $k_1$ ) while The PE on y-axis corresponds to estimated value of the basal deactivation rate ( $P_{basal}$ ). (d) Heatmap shows the accuracy as function of  $k_1$  and  $P_{basal}$  for WT in presence of the induced feedback loop. The PE on x-axis corresponds to estimated value of the basal pathway activity ( $k_1$ ) while The PE on y-axis corresponds to estimated value of the basal deactivation rate ( $P_{basal}$ ).
